# Supplementary material for: Quantification of pharmaceuticals via transmission Raman spectroscopy: data sub-selection
Source: Royal Society of Chemistry journal article supplement (doi:10.1039/c3an01293j), 2013-10-26
Supplement: c3an01293j.r [file c3an01293j.r]

#--Load up required libraries for data analysis
library(pls)
pls_please <- c("Y")

#--Read in the 27 spectra from datafile "data"
spectra <- scale(matrix(scan("transmission_data"), ncol=27, byrow=FALSE))

#--Read in the wavenumber info
wavenumber <- read.table(file="wavenumber", header=F)

#--Define the compositions
compositions <- c(seq(from=0.01, to=0.1, by=0.01), seq(from=0.2, to=0.9, by=0.1), seq(from=0.91, to=0.99, by=0.01))

#--Produce a stacked plot of the spectra
plot(cbind(wavenumber, spectra[,1]), type="l", xlab=bquote(Wavenumber~(cm^-1)), ylab="Intensity (scaled and offset)", ylim=c(-2, 20))
offset <- 0.1
for (i in (1:(length(compositions))))
	{
		points(cbind(wavenumber, spectra[,i]+offset*compositions[i]*100), type="l")
	}

#--Produce a stacked plot of the spectra
plot(cbind(wavenumber, spectra[,1]), type="l", xlab=bquote(Wavenumber~(cm^-1)), ylab="Intensity (scaled and offset)", ylim=c(-2, 20), xlim=c(0, 400))
offset <- 0.1
for (i in (1:(length(compositions))))
	{
		points(cbind(wavenumber, spectra[,i]+offset*compositions[i]*100), type="l")
	}

#--Define the data set for analysis
dataforanalysis <- data.frame(x=compositions, y=I(t(spectra)))

#--Define the number of components to be used for the analysis
ncomps <- 1

#--Do the analysis
plsmodel <- plsr(x ~ y, ncomps, data=dataforanalysis, validation=c("LOO"))

#--Plot the model
plot(plsmodel, main="", xlab="Composition - weighed out", ylab="Composition - modelled from spectra")
abline(0, 1)

#-------------------------------------------------
# Now subsetting
#-------------------------------------------------

minimum_wavenumber <- min(wavenumber)
maximum_wavenumber <- max(wavenumber)

window_size <- 100 # <- in wavenumbers
step_size <- 5

wavenumber_start <- 50

number_of_analyses <- length(seq(from=wavenumber_start, to=(maximum_wavenumber-window_size), by=step_size))
residuals_matrix <- matrix(NA, nrow=number_of_analyses, ncol=2)

par(mfrow=c(2,1))

if (pls_please=="Y")
	{

for (wavenumber_start in (seq(from=wavenumber_start, to=(maximum_wavenumber-window_size), by=step_size)))
	{
		wavenumber_end <- wavenumber_start+window_size
		pixels_to_subset <- which(wavenumber > wavenumber_start & wavenumber < wavenumber_end)
		data_subset <- data.frame(x=compositions, y=dataforanalysis$y[,pixels_to_subset])
		plsmodel <- plsr(x ~ y, ncomps, data=data_subset, validation=c("LOO"))

			# Produce a stacked plot of the spectra
			plot(cbind(wavenumber, spectra[,1]), type="l", xlab=bquote(Wavenumber~(cm^-1)), ylab="Intensity (scaled and offset)", ylim=c(-2, 20))
			offset <- 0.1
				for (i in (1:(length(compositions))))
					{
						points(cbind(wavenumber, spectra[,i]+offset*compositions[i]*100), type="l")
					}
			rect(wavenumber_start, -1, wavenumber_end, 20)

		plot(plsmodel, xlab="Composition - weighed out", ylab="Composition - modelled from spectra", main=paste("PLS model for", wavenumber_start, "to", wavenumber_end), xlim=c(-0.1, 1.1), ylim=c(-0.1, 1.1))
		abline(0, 1)
		this_analysis_number <- (wavenumber_start-50)/step_size+1
		sum_of_squared_residuals <- sum((plsmodel$fitted.values-compositions)^2)
		residuals_matrix[this_analysis_number,1] <- wavenumber_start
		residuals_matrix[this_analysis_number,2] <- sum_of_squared_residuals
		
	}

par(mfrow=c(1,1))
plot(residuals_matrix, xlab="Starting wavenumber", ylab="Goodness-of-fit")

wavenumber_start <- 50

best_window_start_position_index <- which(residuals_matrix[,2]==min(residuals_matrix[,2]))

best_window_start_position <- seq(from=wavenumber_start, to=(maximum_wavenumber-window_size), by=step_size)[best_window_start_position_index]

			# Produce a stacked plot of the spectra
			plot(cbind(wavenumber, spectra[,1]), type="l", xlab=bquote(Wavenumber~(cm^-1)), ylab="Intensity (scaled and offset)", ylim=c(-2, 20), main="Best wavenumber region for quantification")
			offset <- 0.1
				for (i in (1:(length(compositions))))
					{
						points(cbind(wavenumber, spectra[,i]+offset*compositions[i]*100), type="l")
					}
			rect(best_window_start_position, -1, best_window_start_position+window_size, 20)

}
#-------------------------------------------------
#--Publication plots
#-------------------------------------------------

#--Regenerate pls model for best fit region
		wavenumber_end <- best_window_start_position + window_size
		pixels_to_subset <- which(wavenumber > best_window_start_position & wavenumber < wavenumber_end)
		data_subset <- data.frame(x=compositions, y=dataforanalysis$y[,pixels_to_subset])
		plsmodel <- plsr(x ~ y, ncomps, data=data_subset, validation=c("LOO"))
		sum_of_squared_residuals <- sum((plsmodel$fitted.values-compositions)^2)

		#-------------------------------------------------
		#--Try 1 - a but cluttered
		#-------------------------------------------------


par(mfrow=c(2,1))

			#--Produce a stacked plot of the spectra
			par(mar=par()$mar-c(1.3,0,2.5,0))

			plot(cbind(wavenumber, spectra[,1]), type="l", xlab=bquote(Wavenumber~(cm^-1)), ylab="Intensity (scaled and offset)", ylim=c(-2, 20), xlim=c(minimum_wavenumber,maximum_wavenumber))
			offset <- 0.1
				for (i in (1:(length(compositions))))
					{
						points(cbind(wavenumber, spectra[,i]+offset*compositions[i]*100), type="l")
					}
			rect(best_window_start_position, -1, wavenumber_end, 20, border="red")
				#--Restore default clipping rect
				par(mar=c(5, 4, 4, 2) + 0.1)
			#--Now plot the residuals as a function of wavenumber
			par(mar=par()$mar-c(0,0,3,0))
			plot(residuals_matrix, xlab="Starting wavenumber", ylab="Goodness-of-fit", xlim=c(minimum_wavenumber,maximum_wavenumber))
			points(best_window_start_position, sum_of_squared_residuals, col="red", pch=16) 
				#--Restore default clipping rect
				par(mar=c(5, 4, 4, 2) + 0.1)

			#--Modify graphics parameter settings to create an inset plot:
			op <- par(fig=c(0.6, 0.9, 0.25, 0.45), new=TRUE, cex=0.8, mar=c(4, 4, 0, 0))
			#--Plot the "best" pls model
			plot(plsmodel, xlab="Actual composition", ylab="Calculated composition", main="", xlim=c(-0.1, 1.1), ylim=c(-0.1, 1.1), col="red", pch=16)
			abline(0,1)

		#-------------------------------------------------
		#--Try 2 - a bit cluttered
		#-------------------------------------------------

		par(mfrow=c(2,2))
			#--Restore default clipping rect
			par(mar=c(5, 4, 4, 2) + 0.1)
			#-- Plot 1, stacked plot with highlighted area
			plot(cbind(wavenumber, spectra[,1]), type="l", xlab=bquote(Wavenumber~(cm^-1)), ylab="Intensity (scaled and offset)", ylim=c(-2, 20), xlim=c(minimum_wavenumber,maximum_wavenumber), main="1. PLS on subregions")
			offset <- 0.1
				for (i in (1:(length(compositions))))
					{
						points(cbind(wavenumber, spectra[,i]+offset*compositions[i]*100), type="l")
					}
			rect(best_window_start_position, -1, wavenumber_end, 20, border="red")

			#--Plot 3, zoomed in version of stacked plot
			plot(cbind(wavenumber, spectra[,1]), type="l", xlab=bquote(Wavenumber~(cm^-1)), ylab="Intensity (scaled and offset)", ylim=c(-0, 17.5), xlim=c(best_window_start_position, best_window_start_position+window_size), main="3. Detailed view of best subregion", xaxs="i")
			offset <- 0.1
				for (i in (1:(length(compositions))))
					{
						points(cbind(wavenumber, spectra[,i]+offset*compositions[i]*100), type="l")
					}
			rect(best_window_start_position, -1, wavenumber_end, 20, border="red")

			#-- Plot 2, variation in goodness of fit with wavenumber
			plot(residuals_matrix, xlab="Starting wavenumber", ylab="Goodness-of-fit", xlim=c(minimum_wavenumber,maximum_wavenumber), main="2. Rank subregions")
			points(best_window_start_position, sum_of_squared_residuals, col="red", pch=16) 

			#--Plot 4, pls model for that region
			plot(plsmodel, xlab="Actual composition", ylab="Calculated composition", xlim=c(-0.1, 1.1), ylim=c(-0.1, 1.1), pch=16, main="PLS model for best subregion")
			abline(0,1)
		#---------------------------------
		#-- Worst region
		#---------------------------------
wavenumber_start <- 50

worst_window_start_position_index <- which(residuals_matrix[,2]==max(residuals_matrix[,2]))

worst_window_start_position <- seq(from=wavenumber_start, to=(maximum_wavenumber-window_size), by=step_size)[worst_window_start_position_index]

#--Regenerate pls model for worst fit region
		wavenumber_end <- worst_window_start_position + window_size
		pixels_to_subset <- which(wavenumber > worst_window_start_position & wavenumber < wavenumber_end)
		data_subset <- data.frame(x=compositions, y=dataforanalysis$y[,pixels_to_subset])
		plsmodel <- plsr(x ~ y, ncomps, data=data_subset, validation=c("LOO"))
		sum_of_squared_residuals <- sum((plsmodel$fitted.values-compositions)^2)

		par(mfrow=c(2,2))
			#--Restore default clipping rect
			par(mar=c(5, 4, 4, 2) + 0.1)
			#-- Plot 1, stacked plot with highlighted area
			plot(cbind(wavenumber, spectra[,1]), type="l", xlab=bquote(Wavenumber~(cm^-1)), ylab="Intensity (scaled and offset)", ylim=c(-2, 20), xlim=c(minimum_wavenumber,maximum_wavenumber), main="1. PLS on subregions")
			offset <- 0.1
				for (i in (1:(length(compositions))))
					{
						points(cbind(wavenumber, spectra[,i]+offset*compositions[i]*100), type="l")
					}
			rect(worst_window_start_position, -1, wavenumber_end, 20, border="red")

			#--Plot 3, zoomed in version of stacked plot
			plot(cbind(wavenumber, spectra[,1]), type="l", xlab=bquote(Wavenumber~(cm^-1)), ylab="Intensity (scaled and offset)", ylim=c(-0.2, 2.1), xlim=c(worst_window_start_position, worst_window_start_position+window_size), main="3. Detailed view of worst subregion")
			offset <- 0.02
				for (i in (1:(length(compositions))))
					{
						points(cbind(wavenumber, spectra[,i]+offset*compositions[i]*100), type="l")
					}
			rect(worst_window_start_position, -1, wavenumber_end, 20, border="red")

			#-- Plot 2, variation in goodness of fit with wavenumber
			plot(residuals_matrix, xlab="Starting wavenumber", ylab="Goodness-of-fit", xlim=c(minimum_wavenumber,maximum_wavenumber), main="2. Rank subregions")
			points(worst_window_start_position, sum_of_squared_residuals, col="red", pch=16) 

			#--Plot 4, pls model for that region
			plot(plsmodel, xlab="Actual composition", ylab="Calculated composition", xlim=c(-0.1, 1.1), ylim=c(-0.1, 1.1), pch=16, main="PLS model for worst subregion")
			abline(0,1)

par(mfrow=c(2,1))
			#--Plot 3, zoomed in version of stacked plot
			plot(cbind(wavenumber, spectra[,1]), type="l", xlab=bquote(Wavenumber~(cm^-1)), ylab="Intensity (scaled and offset)", ylim=c(-0.2, 0.3), xlim=c(worst_window_start_position, worst_window_start_position+window_size), main="3. Detailed view of worst subregion")
			offset <- 0.0
				for (i in (1:(length(compositions))))
					{
						points(cbind(wavenumber, spectra[,i]+offset*compositions[i]*100), type="l")
					}
			#--Plot 3, zoomed in version of stacked plot
			plot(cbind(wavenumber, spectra[,1]), type="l", xlab=bquote(Wavenumber~(cm^-1)), ylab="Intensity (scaled and offset)", ylim=c(-0.6, 0.5), xlim=c(1500, max(wavenumber)), main="3. Detailed view of worst subregion")
			offset <- 0.0
				for (i in (1:(length(compositions))))
					{
						points(cbind(wavenumber, spectra[,i]+offset*compositions[i]*100), type="l")
					}


		#-------------------------------------------------
		#--Try 3
		#-------------------------------------------------

pdf(file="Figure_1_best_continuous_100_cm_window_for_publication.pdf", 6, 8)

		#---------------------------------
		#-- Best region
		#---------------------------------
wavenumber_start <- 50

best_window_start_position_index <- which(residuals_matrix[,2]==min(residuals_matrix[,2]))

best_window_start_position <- seq(from=wavenumber_start, to=(maximum_wavenumber-window_size), by=step_size)[best_window_start_position_index]

#--Regenerate pls model for worst fit region
		wavenumber_end <- best_window_start_position + window_size
		pixels_to_subset <- which(wavenumber > best_window_start_position & wavenumber < wavenumber_end)
		data_subset <- data.frame(x=compositions, y=dataforanalysis$y[,pixels_to_subset])
		plsmodel <- plsr(x ~ y, ncomps, data=data_subset, validation=c("LOO"))
		sum_of_squared_residuals <- sum((plsmodel$fitted.values-compositions)^2)

layout(matrix(c(1,1,2,2,3,4), 3, 2, byrow=T))

			#--
			#--Plot 1, spectra
			#--

			plot(cbind(wavenumber, spectra[,1]), type="l", xlab=bquote(Wavenumber~(cm^-1)), ylab="Intensity (scaled and offset)", ylim=c(-2, 20), xlim=c(minimum_wavenumber,maximum_wavenumber), main="a) Input spectra, best fit region highlighted")
			offset <- 0.1
				for (i in (1:(length(compositions))))
					{
						points(cbind(wavenumber, spectra[,i]+offset*compositions[i]*100), type="l")
					}
			rect(best_window_start_position, -1, best_window_start_position+window_size, 20, border="red")

			#--
			#--Plot 2, goodness-of-fit
			#--

			plot(residuals_matrix[,1]+window_size/2, residuals_matrix[,2], xlab="Starting wavenumber", ylab="Goodness-of-fit", xlim=c(minimum_wavenumber,maximum_wavenumber), main="b) Sub-regions rated by quality of PLS model")
			points(best_window_start_position+window_size/2, sum_of_squared_residuals, col="red", pch=16) 
			library(IDPmisc) #-- <- allows filled arrow heads
			Arrows(best_window_start_position+(window_size/2), 0.4, best_window_start_position+(window_size/2), 0.05, h.col.bo="red", sh.col="red", h.col="red", open=F, size=0.25)
			text(best_window_start_position+(window_size/2), 0.5, "Best fit", col="red")


			#--
			#--Plot 3, zoomed in on spectra, best fit region
			#--

			plot(cbind(wavenumber, spectra[,1]), type="l", xlab=bquote(Wavenumber~(cm^-1)), ylab="Intensity (scaled and offset)", ylim=c(-0, 17.5), xlim=c(best_window_start_position, best_window_start_position+window_size), main="c) Detailed view of best sub-region", xaxs="i")
			offset <- 0.1
				for (i in (1:(length(compositions))))
					{
						points(cbind(wavenumber, spectra[,i]+offset*compositions[i]*100), type="l")
					}

			#--
			#--Plot 4, PLS model observed vs calculated
			#--

			plot(plsmodel, xlab="Actual composition", ylab="Calculated composition", xlim=c(-0.1, 1.1), ylim=c(-0.1, 1.1), pch=16, main="d) PLS model for best subregion")
			abline(0,1)

dev.off()

		#---------------------------------
		#-- Worst region
		#---------------------------------
pdf(file="Worst_100_cm_window_for_publication.pdf", 6, 8)

wavenumber_start <- 50

worst_window_start_position_index <- which(residuals_matrix[,2]==max(residuals_matrix[,2]))

worst_window_start_position <- seq(from=wavenumber_start, to=(maximum_wavenumber-window_size), by=step_size)[worst_window_start_position_index]

#--Regenerate pls model for worst fit region
		wavenumber_end <- worst_window_start_position + window_size
		pixels_to_subset <- which(wavenumber > worst_window_start_position & wavenumber < wavenumber_end)
		data_subset <- data.frame(x=compositions, y=dataforanalysis$y[,pixels_to_subset])
		plsmodel <- plsr(x ~ y, ncomps, data=data_subset, validation=c("LOO"))
		sum_of_squared_residuals <- sum((plsmodel$fitted.values-compositions)^2)

layout(matrix(c(1,1,2,2,3,4), 3, 2, byrow=T))

			#--
			#--Plot 1, spectra
			#--

			plot(cbind(wavenumber, spectra[,1]), type="l", xlab=bquote(Wavenumber~(cm^-1)), ylab="Intensity (scaled and offset)", ylim=c(-2, 20), xlim=c(minimum_wavenumber,maximum_wavenumber), main="a) Input spectra, worst fit region highlighted")
			offset <- 0.1
				for (i in (1:(length(compositions))))
					{
						points(cbind(wavenumber, spectra[,i]+offset*compositions[i]*100), type="l")
					}
			rect(worst_window_start_position, -1, worst_window_start_position+window_size, 20, border="red")

			#--
			#--Plot 2, goodness-of-fit
			#--

			plot(residuals_matrix[,1]+window_size/2, residuals_matrix[,2], xlab="Starting wavenumber", ylab="Goodness-of-fit", xlim=c(minimum_wavenumber,maximum_wavenumber), main="b) Sub-regions rated by quality of PLS model")
			points(worst_window_start_position+window_size/2, sum_of_squared_residuals, col="red", pch=16) 
			library(IDPmisc) #-- <- allows filled arrow heads
			Arrows(worst_window_start_position+(window_size/2)+300, 1.15, worst_window_start_position+(window_size/2)+50, 1.15, h.col.bo="red", sh.col="red", h.col="red", open=F, size=0.25)
			text(worst_window_start_position+(window_size/2)+350, 1.15, "Worst fit", col="red")


			#--
			#--Plot 3, zoomed in on spectra, worst fit region
			#--

			plot(cbind(wavenumber, spectra[,1]), type="l", xlab=bquote(Wavenumber~(cm^-1)), ylab="Intensity (scaled and offset)", ylim=c(-0.25, 0.3), xlim=c(worst_window_start_position, worst_window_start_position+window_size), main="c) Detailed view of worst sub-region", xaxs="i")
			offset <- 0.002
				for (i in (1:(length(compositions))))
					{
						points(cbind(wavenumber, spectra[,i]+offset*compositions[i]*100), type="l")
					}

			#--
			#--Plot 4, PLS model observed vs calculated
			#--

			plot(plsmodel, xlab="Actual composition", ylab="Calculated composition", xlim=c(-0.1, 1.1), ylim=c(-0.1, 1.1), pch=16, main="d) PLS model for worst subregion")
			abline(0,1)

dev.off()

#--------------------------------------------------------------------------------------------------
#-- Final plot
#--------------------------------------------------------------------------------------------------


		#---------------------------------
		#-- Worst region
		#---------------------------------
pdf(file="Continuous_regions_for_publication.pdf", 6, 9)

layout(matrix(c(1,1,2,2,3,5,4,6), 4, 2, byrow=T))


		#---------------------------------
		#-- Best region
		#---------------------------------
wavenumber_start <- 50

best_window_start_position_index <- which(residuals_matrix[,2]==min(residuals_matrix[,2]))

best_window_start_position <- seq(from=wavenumber_start, to=(maximum_wavenumber-window_size), by=step_size)[best_window_start_position_index]

#--Regenerate pls model for worst fit region
		wavenumber_end <- best_window_start_position + window_size
		pixels_to_subset <- which(wavenumber > best_window_start_position & wavenumber < wavenumber_end)
		data_subset <- data.frame(x=compositions, y=dataforanalysis$y[,pixels_to_subset])
		plsmodel_best <- plsr(x ~ y, ncomps, data=data_subset, validation=c("LOO"))
		sum_of_squared_residuals_best <- sum((plsmodel$fitted_best.values-compositions)^2)


wavenumber_start <- 50

worst_window_start_position_index <- which(residuals_matrix[,2]==max(residuals_matrix[,2]))

worst_window_start_position <- seq(from=wavenumber_start, to=(maximum_wavenumber-window_size), by=step_size)[worst_window_start_position_index]

#--Regenerate pls model for worst fit region
		wavenumber_end <- worst_window_start_position + window_size
		pixels_to_subset <- which(wavenumber > worst_window_start_position & wavenumber < wavenumber_end)
		data_subset <- data.frame(x=compositions, y=dataforanalysis$y[,pixels_to_subset])
		plsmodel_worst <- plsr(x ~ y, ncomps, data=data_subset, validation=c("LOO"))
		sum_of_squared_residuals_worst <- sum((plsmodel_worst$fitted.values-compositions)^2)

			#--
			#--Plot 1, spectra
			#--

			plot(cbind(wavenumber, spectra[,1]), type="l", xlab=bquote(Wavenumber~(cm^-1)), ylab="Intensity (scaled and offset)", ylim=c(-2, 20), xlim=c(minimum_wavenumber,maximum_wavenumber), main="a) Input spectra, best and worst fit regions highlighted")
			offset <- 0.1
				for (i in (1:(length(compositions))))
					{
						points(cbind(wavenumber, spectra[,i]+offset*compositions[i]*100), type="l")
					}
			rect(worst_window_start_position, -1, worst_window_start_position+window_size, 20, border="red")
text(best_window_start_position+window_size+150, 17.5, "Best fit", col="red")
text(worst_window_start_position+window_size+150, 17.5, "Worst fit", col="red")
			rect(best_window_start_position, -1, best_window_start_position+window_size, 20, border="red")

			#--
			#--Plot 2, goodness-of-fit
			#--

			plot(residuals_matrix[,1]+window_size/2, residuals_matrix[,2], xlab="Starting wavenumber", ylab="Goodness-of-fit", xlim=c(minimum_wavenumber,maximum_wavenumber), main="b) Sub-regions rated by quality of PLS model")
			points(worst_window_start_position+window_size/2, sum_of_squared_residuals_worst, col="red", pch=16) 
			points(best_window_start_position+window_size/2, sum_of_squared_residuals_best, col="red", pch=16) 
			library(IDPmisc) #-- <- allows filled arrow heads
			Arrows(worst_window_start_position+(window_size/2)+300, 1.05, worst_window_start_position+(window_size/2)+50, 1.15, h.col.bo="red", sh.col="red", h.col="red", open=F, size=0.25)
			text(worst_window_start_position+(window_size/2)+420, 1.05, "Worst fit", col="red")
			Arrows(best_window_start_position+(window_size/2), 0.4, best_window_start_position+(window_size/2), 0.05, h.col.bo="red", sh.col="red", h.col="red", open=F, size=0.25)
			text(best_window_start_position+(window_size/2), 0.5, "Best fit", col="red")


			#--
			#--Plot 3, zoomed in on spectra, best fit region
			#--

			plot(cbind(wavenumber, spectra[,1]), type="l", xlab=bquote(Wavenumber~(cm^-1)), ylab="Intensity (scaled and offset)", ylim=c(-0, 17.5), xlim=c(best_window_start_position, best_window_start_position+window_size), main="c) Detailed view of best sub-region", xaxs="i")
			offset <- 0.1
				for (i in (1:(length(compositions))))
					{
						points(cbind(wavenumber, spectra[,i]+offset*compositions[i]*100), type="l")
					}

			#--

			#--
			#--Plot 4, PLS model observed vs calculated
			#--
			plot(plsmodel_best, xlab="Actual composition", ylab="Calculated composition", xlim=c(-0.1, 1.1), ylim=c(-0.1, 1.1), pch=16, main="d) PLS model for best subregion")
			abline(0,1)


			#--
			#--Plot 5, zoomed in on spectra, worst fit region
			#--

			plot(cbind(wavenumber, spectra[,1]), type="l", xlab=bquote(Wavenumber~(cm^-1)), ylab="Intensity (scaled and offset)", ylim=c(-0.25, 0.3), xlim=c(worst_window_start_position, worst_window_start_position+window_size), main="e) Detailed view of worst sub-region", xaxs="i")
			offset <- 0.002
				for (i in (1:(length(compositions))))
					{
						points(cbind(wavenumber, spectra[,i]+offset*compositions[i]*100), type="l")
					}


			#--
			#--Plot 6, PLS model observed vs calculated
			#--

			plot(plsmodel_worst, xlab="Actual composition", ylab="Calculated composition", xlim=c(-0.1, 1.1), ylim=c(-0.1, 1.1), pch=16, main="f) PLS model for worst subregion")
			abline(0,1)

dev.off()

#--print out numbers for paper
print("=====")
print(RMSEP(plsmodel_best))
print("=====")
print(RMSEP(plsmodel_worst))
plsmodel <- plsr(x ~ y, ncomps, data=dataforanalysis, validation=c("LOO"))
print("=====")
print(RMSEP(plsmodel))
