# Supplementary material for: Quantification of pharmaceuticals via transmission Raman spectroscopy: data sub-selection
Source: Royal Society of Chemistry journal article supplement (doi:10.1039/c3an01293j), 2013-10-26
Supplement: c3an01293j_2.r [file c3an01293j_2.r]

# Run the sparse PLS maths and output the "100_most_important_points" file which we use here...
source("sparse_solution.R")

#--flip the spectra around again...
spectra <- t(spectra)

#--Read in the wavenumber info
wavenumber <- read.table(file="wavenumber", header=F)

hundred_most_important_data_points <- read.table(file="100_most_important_points", header=F)

spectra_only_showing_hundred_most_important_points <- spectra[data.matrix(hundred_most_important_data_points),]

wavenumber_only_showing_hundred_most_important_points <- wavenumber[data.matrix(hundred_most_important_data_points),]

#-------------------------------------------------
#-- Now PCA
#-------------------------------------------------

require(pcaMethods)
pcaresults <- pca(t(spectra), nPcs=10)
PC1_loading <- cbind(wavenumber, abs(pcaresults@loadings[,1]))
names(PC1_loading) <- c("wavenumber", "loading")
PC1_most_important_100_values <- PC1_loading[with(PC1_loading, order(-PC1_loading$loading)),][1:100,]
wavenumber_only_showing_100_most_important_PC1_loadings <- PC1_most_important_100_values[,1]


#--Produce a stacked plot of the spectra

pdf(file="Figure_2_best_non_continuous_100_cm_window.pdf", 6, 6)
layout(matrix(c(1,1,3,2), 2, 2, byrow = TRUE))

#--
#--Plot 1, entire wavenumber range
#--
par(mar=c(5.1, 4.1, 4.1, 2.1))
par(mar=c(4.1, 4.1, 0.5, 2.1))
plot(cbind(wavenumber, spectra[,1]), type="l", xlab=bquote(Wavenumber~(cm^-1)), ylab="Intensity (scaled and offset)", ylim=c(-2, 20))
offset <- 0.1
for (i in (2:(length(compositions))))
	{
		points(cbind(wavenumber, spectra[,i]+offset*compositions[i]*100), type="l")
	}
segments(wavenumber_only_showing_hundred_most_important_points, -1, wavenumber_only_showing_hundred_most_important_points, -0.5, col="red", lwd = par("lwd")/1)
segments(wavenumber_only_showing_100_most_important_PC1_loadings, -1.5, wavenumber_only_showing_100_most_important_PC1_loadings, -2, col="black", lwd = par("lwd")/1)

#--
#--Plot 2, 750 to 1020
#--

par(mar=c(5.1, 4.1, 0.5, 2.1))
plot(cbind(wavenumber, spectra[,1]), type="l", xlab=bquote(Wavenumber~(cm^-1)), ylab="Intensity (scaled and offset)", ylim=c(-2, 12), xlim=c(750, 1020))
offset <- 0.1
for (i in (2:(length(compositions))))
	{
		points(cbind(wavenumber, spectra[,i]+offset*compositions[i]*100), type="l")
	}
segments(wavenumber_only_showing_hundred_most_important_points, -1, wavenumber_only_showing_hundred_most_important_points, -0.5, col="red", lwd = par("lwd")/1)
segments(wavenumber_only_showing_100_most_important_PC1_loadings, -1.5, wavenumber_only_showing_100_most_important_PC1_loadings, -2, col="black", lwd = par("lwd")/1)

#--
#--Plot 3, 40 to 350
#--

plot(cbind(wavenumber, spectra[,1]), type="l", xlab=bquote(Wavenumber~(cm^-1)), ylab="Intensity (scaled and offset)", ylim=c(-2, 20), xlim=c(40, 350))
offset <- 0.1
for (i in (2:(length(compositions))))
	{
		points(cbind(wavenumber, spectra[,i]+offset*compositions[i]*100), type="l")
#		points(wavenumber_only_showing_hundred_most_important_points, spectra_only_showing_hundred_most_important_points[,i]+offset*compositions[i]*100, col="red", cex=0.25, pch=16)

	}
segments(wavenumber_only_showing_hundred_most_important_points, -1, wavenumber_only_showing_hundred_most_important_points, -0.5, col="red", lwd = par("lwd")/1)
segments(wavenumber_only_showing_100_most_important_PC1_loadings, -1.5, wavenumber_only_showing_100_most_important_PC1_loadings, -2, col="black", lwd = par("lwd")/1)

dev.off()

#-- For comparison, run those 100 best data points with the standard PLS library
library(pls)

data_for_pls <- data.frame(x=compositions, y=I(t(spectra_only_showing_hundred_most_important_points)))
plsmodel <- plsr(x ~ y, 1, data=data_for_pls, validaton=c("LOO"))
			plot(plsmodel, xlab="Actual composition", ylab="Calculated composition", xlim=c(-0.1, 1.1), ylim=c(-0.1, 1.1), pch=16, main="d) PLS model using 100 best points")
			abline(0,1)
		sum_of_squared_residuals <- sum((plsmodel$fitted.values-compositions)^2)
