# Supplementary material for: Quantification of pharmaceuticals via transmission Raman spectroscopy: data sub-selection
Source: Royal Society of Chemistry journal article supplement (doi:10.1039/c3an01293j), 2013-10-26
Supplement: c3an01293j_3.r [file c3an01293j_3.r]

pls <- function(X, Y, ncomp){

Y <- as.matrix(Y)

nobj <- dim(X)[1]
npred <- dim(X)[2]
nresp <- dim(Y)[2]

## Center variables:
Xmeans <- colMeans(X)
X <- X - rep(Xmeans, each = nobj)
Ymeans <- colMeans(Y)
Y <- Y - rep(Ymeans, each = nobj)

## Projection, loadings
W <- P <- R <- matrix(0, nrow = npred, ncol = ncomp)
Q <- matrix(0, nrow = nresp, ncol = ncomp)
T <- matrix(0, nrow = nobj, ncol = ncomp)
tsqs <- rep.int(1, ncomp)

## 1.
XtY <- crossprod(X, Y)

for (a in 1:ncomp) {
	## 2.
#         if (nresp == 1) {
	w.a <- XtY / sqrt(c(crossprod(XtY)))
#         } else {
#             if (nresp < npred) {
#                 ## FIXME: is q proportional to q.a?
#                 q <- eigen(crossprod(XtY), symmetric = TRUE)$vectors[,1]
#                 w.a <- XtY %*% q
#                 w.a <- w.a / sqrt(c(crossprod(w.a)))
#             } else {
#                 w.a <- eigen(XtY %*% t(XtY), symmetric = TRUE)$vectors[,1]
#             }
#         }
# 
	## 3.
	r.a <- w.a
	if (a > 1) {
		for (j in 1:(a - 1)){
			r.a <- r.a - (P[,j] %*% w.a) * R[,j]
		}
	}

	## 4.
	t.a <- X %*% r.a
	tsq <- c(crossprod(t.a))
	p.a <- crossprod(X, t.a) / tsq
	q.a <- crossprod(XtY, r.a) / tsq

	## 5.
	XtY <- XtY - (tsq * p.a) %*% t(q.a)

	## 6
	W[,a] <- w.a
	P[,a] <- p.a
	Q[,a] <- q.a
	R[,a] <- r.a
	T[,a] <- t.a
	tsqs[a] <- tsq
}

## 8
BPLS <- R %*% t(Q)
fitted <- X %*% BPLS

residuals <- - fitted + c(Y)
fitted <- fitted + rep(Ymeans, each = nobj) # Add mean
RSS <- crossprod(residuals)
percent <- 100*(crossprod(Y)-RSS)/crossprod(Y)

list(coefficients = BPLS,
scores = T,
loadings = P,
loading.weights = W,
Yloadings = Q,
projection = R,
Xmeans = Xmeans,
Ymeans = Ymeans,
fitted.values = fitted,
residuals = residuals,
Xvar = crossprod( t(X)%*%T ) / tsqs,
Xtotvar = sum(X * X),
Yvar = crossprod( t(T)%*%Y ) / tsqs,
Ytotvar = sum(Y * Y),
XYcov = crossprod( t(X)%*%Y ) - crossprod(XtY),
XYtotcov = crossprod( t(X)%*%Y ),
X=X,
Y=Y )

# RSS = RSS,
# percent = percent)

}
