# Supplementary material for: Quantification of pharmaceuticals via transmission Raman spectroscopy: data sub-selection
Source: Royal Society of Chemistry journal article supplement (doi:10.1039/c3an01293j), 2013-10-26
Supplement: c3an01293j_4.r [file c3an01293j_4.r]

# Load up sparse PLS code (custom)
source("spls_cb.R")
# Load up a pls funsction (custom)
source("pls.R")

# Read in the 27 spectra from datafile "data"
spectra <- scale(matrix(scan("transmission_data"), ncol=27, byrow=FALSE))
# And transpose them for convenience...
spectra <- t(spectra)
# Define the composition
compositions <- c(seq(from=0.01, to=0.1, by=0.01), seq(from=0.2, to=0.9, by=0.1), seq(from=0.91, to=0.99, by=0.01))


x<-spectra
y<-compositions

# run full model in order to calculate total (co)variances
plsmodel <- pls(spectra, compositions, ncomp=1)
Xtotvar <- plsmodel$Xtotvar
Ytotvar <- plsmodel$Ytotvar
XYtotcov <- plsmodel$XYtotcov

# Compare how the variance explained & number of active variables change for different values of eta

etavalues <- seq(0,0.999999,0.01)
Xpercent <- rep(0,length(etavalues))
Ypercent <- rep(0,length(etavalues))
XYpercent <- rep(0,length(etavalues))
nactive <- rep(0,length(etavalues))
active <- matrix(0,length(etavalues),dim(spectra)[2])
sumW <- rep(0,length(etavalues))

for (i in 1:length(etavalues)){
	splsmodel <- spls_cb(spectra,compositions,etavalues[i])
# 	sumbeta[i]<-sum(abs(splsmodel$coefficients))
	nactive[i]<-length(splsmodel$active.variables)
	active[i,splsmodel$active.variables]<-1

	plsmodel <- pls(spectra[,splsmodel$active.variables], compositions, ncomp=1)
	Xpercent[i]<-100*plsmodel$Xvar/Xtotvar
	Ypercent[i]<-100*plsmodel$Yvar/Ytotvar
	XYpercent[i]<-100*plsmodel$XYcov/XYtotcov
	sumW[i] <- sum(abs(plsmodel$loading.weights))
}

par(mfrow=c(1,1))
image(active,axes=FALSE,xlab="eta",ylab="variable")
axis( 1, at=seq(0,1,length=length(etavalues)), labels=etavalues, tck=FALSE)
axis( 2, at=seq(0,1,length=dim(spectra)[2]), labels=c(1:dim(spectra)[2]), tck=FALSE)

par(mfrow=c(1,1))
plot(etavalues,Xpercent,type="l",xlab="eta",ylab="percentage of (co)variance accounted for")
lines(etavalues,Ypercent,col=2)
lines(etavalues,XYpercent,col=3)
# plot(etavalues,nactive,type="l",xlab="eta",ylab="number of active variables")
# plot(etavalues,sumW,type="l",xlab="eta",ylab="sum of absolute value of weights")

# Crude algorithm for finding the value of eta that gives exactly ptarget active variables 

ptarget <- 100
eta <- 0.5
etamin <- 0
etamax <- 1
stop <- 0

while (stop==0){
	splsmodel <- spls_cb(spectra,compositions,eta)
# 	splsmodel <- spls(x,y,K=1,eta,fit="kernelpls",scale.x=FALSE)
	nactive <- length(splsmodel$active.variables)
# 	print(c(eta,nactive))
	if (nactive<ptarget){
		etamax <- eta
		eta <- (eta+etamin)/2
	}
	if (nactive>ptarget){
		etamin <- eta
		eta <- (eta+etamax)/2
	}
	if (nactive==ptarget){
		stop <- 1
	}
}


plsmodel <- pls(spectra[,splsmodel$active.variables], compositions, ncomp=1)
print(eta)
print(100*plsmodel$Xvar/Xtotvar)
print(100*plsmodel$Yvar/Ytotvar)
print(100*plsmodel$XYcov/XYtotcov)
par(mfrow=c(1,1))
plot(spectra[round(length(compositions)/2),],type="l",ylab="counts/a.u.")
points(splsmodel$active.variables,spectra[round(length(compositions)/2),splsmodel$active.variables],col=2)
# added by JB
write.table(splsmodel$active.variables, file=paste(ptarget,"_most_important_points",sep=""), col.names=F, row.names=F)

# Continuous window of length ptarget

ptarget <- 50
p <- dim(spectra)[2]
d <- round(ptarget/2)
cmin <- d+1
cmax <- p-d
Xpercent <- rep(0,length(cmax-cmin+1))
Ypercent <- rep(0,length(cmax-cmin+1))
XYpercent <- rep(0,length(cmax-cmin+1))

for (i in cmin:cmax){
	plsmodel <- pls(spectra[,(i-d):(i+d)], compositions, ncomp=1)
	Xpercent[i-d] <- 100*plsmodel$Xvar/Xtotvar
	Ypercent[i-d] <- 100*plsmodel$Yvar/Ytotvar
	XYpercent[i-d] <- 100*plsmodel$XYcov/XYtotcov
}

par(mfrow=c(2,1))
plot(spectra[round(length(compositions)/2),],type="l",ylab="counts/a.u.")
lines(c(which.max(XYpercent),which.max(XYpercent)+2*d),c(0,0),col=2)

plot(cmin:cmax,Xpercent,type="l",xlab="observation", ylab="% of (co)variance accounted for",xlim=c(1,p),ylim=c(0,100))
lines(cmin:cmax,Ypercent,col=2)
lines(cmin:cmax,XYpercent,col=3)


plsmodel <- pls(spectra, compositions, ncomp=1)

pdf(file="Graphical_abstract.pdf", 8, 6)
library(IDPmisc)
plot(spectra[round(length(compositions)/2),],type="l",ylab="counts/a.u.", ylim=c(-1, 15))
points(splsmodel$active.variables,spectra[round(length(compositions)/2),splsmodel$active.variables]+7,col="black", pch=20)
Arrows(250, 1, 250, 6, h.col.bo="red", sh.col="red", h.col="red", open=F, size=1)
text(260, 3, "Sub-selection", col="red", adj=c(0,0))
