# Supplementary material for: Quantification of pharmaceuticals via transmission Raman spectroscopy: data sub-selection
Source: Royal Society of Chemistry journal article supplement (doi:10.1039/c3an01293j), 2013-10-26
Supplement: c3an01293j_5.r [file c3an01293j_5.r]

spls_cb <- function(x,y,eta){

# Fits only 1 latent vector - assumes y is univariate.
# Adapted from code by Sunduz Keles based on paper:
# Chun & Keles (2010), J. Royal Stat. Soc. Series B, 72-3:25
# See spls package for more general case
# eta=0 gives pls solution, eta=1 gives zero parameters

x <- as.matrix(x)
n <- nrow(x)
p <- ncol(x)
ip <- c(1:p)
y <- as.matrix(y)
one <- rep(1,n)

# center & scale y & x
mu <- one %*% y / n
y <- scale( y, drop(mu), FALSE )
meanx <- drop( one %*% x ) / n
x <- scale( x, meanx, FALSE )

# fit direction vector
Z <- t(x) %*% y
what <- matrix( 0, length(Z), 1 )
if ( eta < 1 ){
	valb <- abs(Z) - eta * max( abs(Z) )
	what[ valb>=0 ] <- valb[ valb>=0 ] * (sign(Z))[ valb>=0 ]
}

# construct A
A <- unique( ip[ what!=0] )

# fit pls with predictors in A
xA <- matrix(x[,A],n,length(A))
plsfit <- pls(xA, y, ncomp=1)
betahat <- matrix( 0, p, 1)
betahat[A,] <- matrix( plsfit$coefficients, length(A), 1)

list(coefficients = betahat,
active.variables = A)

}
